# Supplementary material for: ZNF281/Zfp281 is a target of miR‐1 and counteracts muscle differentiation
Source: PubMed Central journal article supplement (PMC6998661; doi:10.1002/1878-0261.12605), 2019-12-24

# Supplementary Figure S1 related to Figure 1

**A**

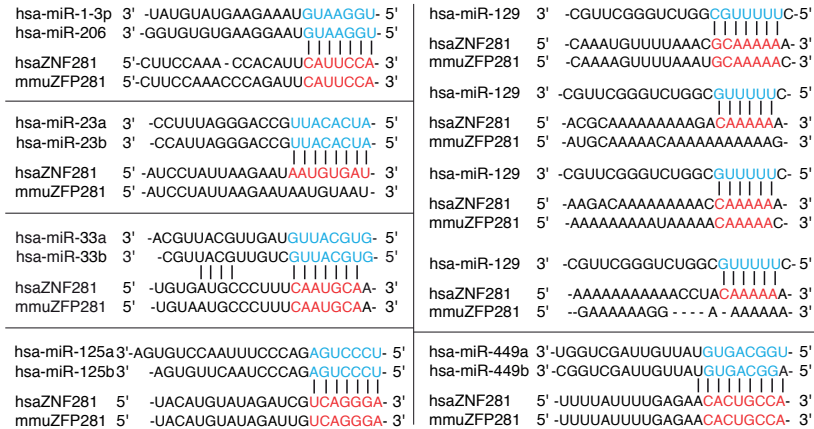

**B**

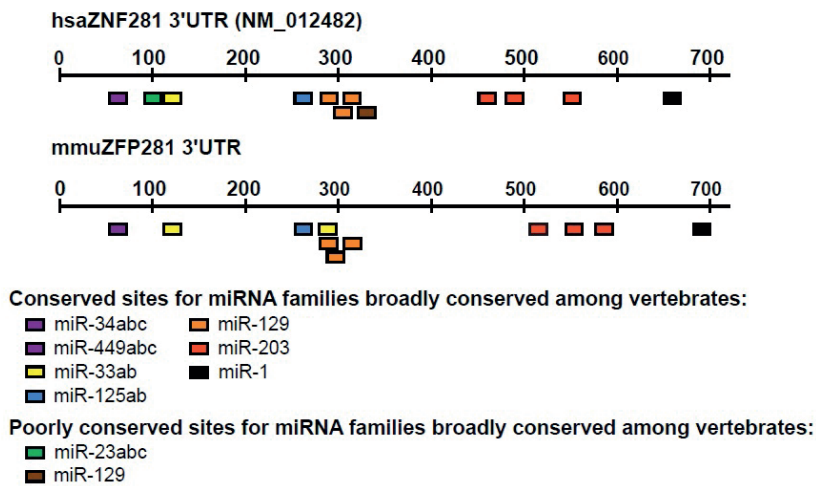

**C**

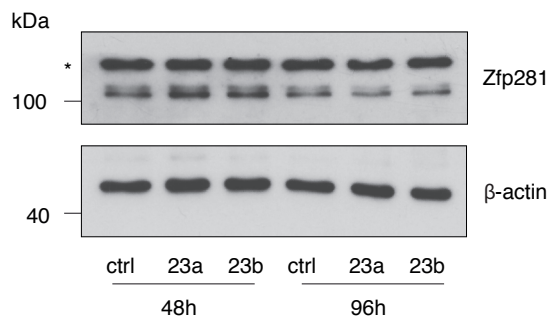

**D**

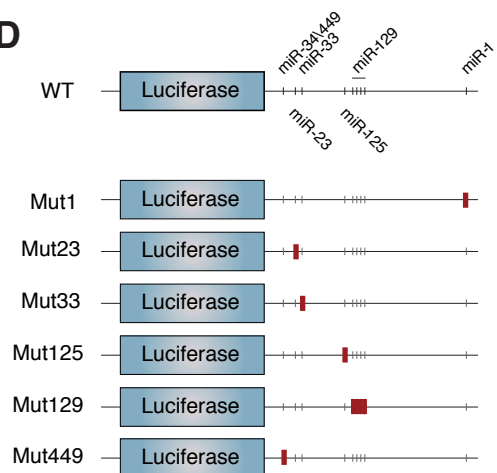

Supplement: MOL2-14-294-s001.pdf [file MOL2-14-294-s001.pdf]
