# Supplementary material for: ZNF281/Zfp281 is a target of miR‐1 and counteracts muscle differentiation
Source: PubMed Central journal article supplement (PMC6998661; doi:10.1002/1878-0261.12605), 2019-12-24

# Supplementary Figure S2 related to Figure 2

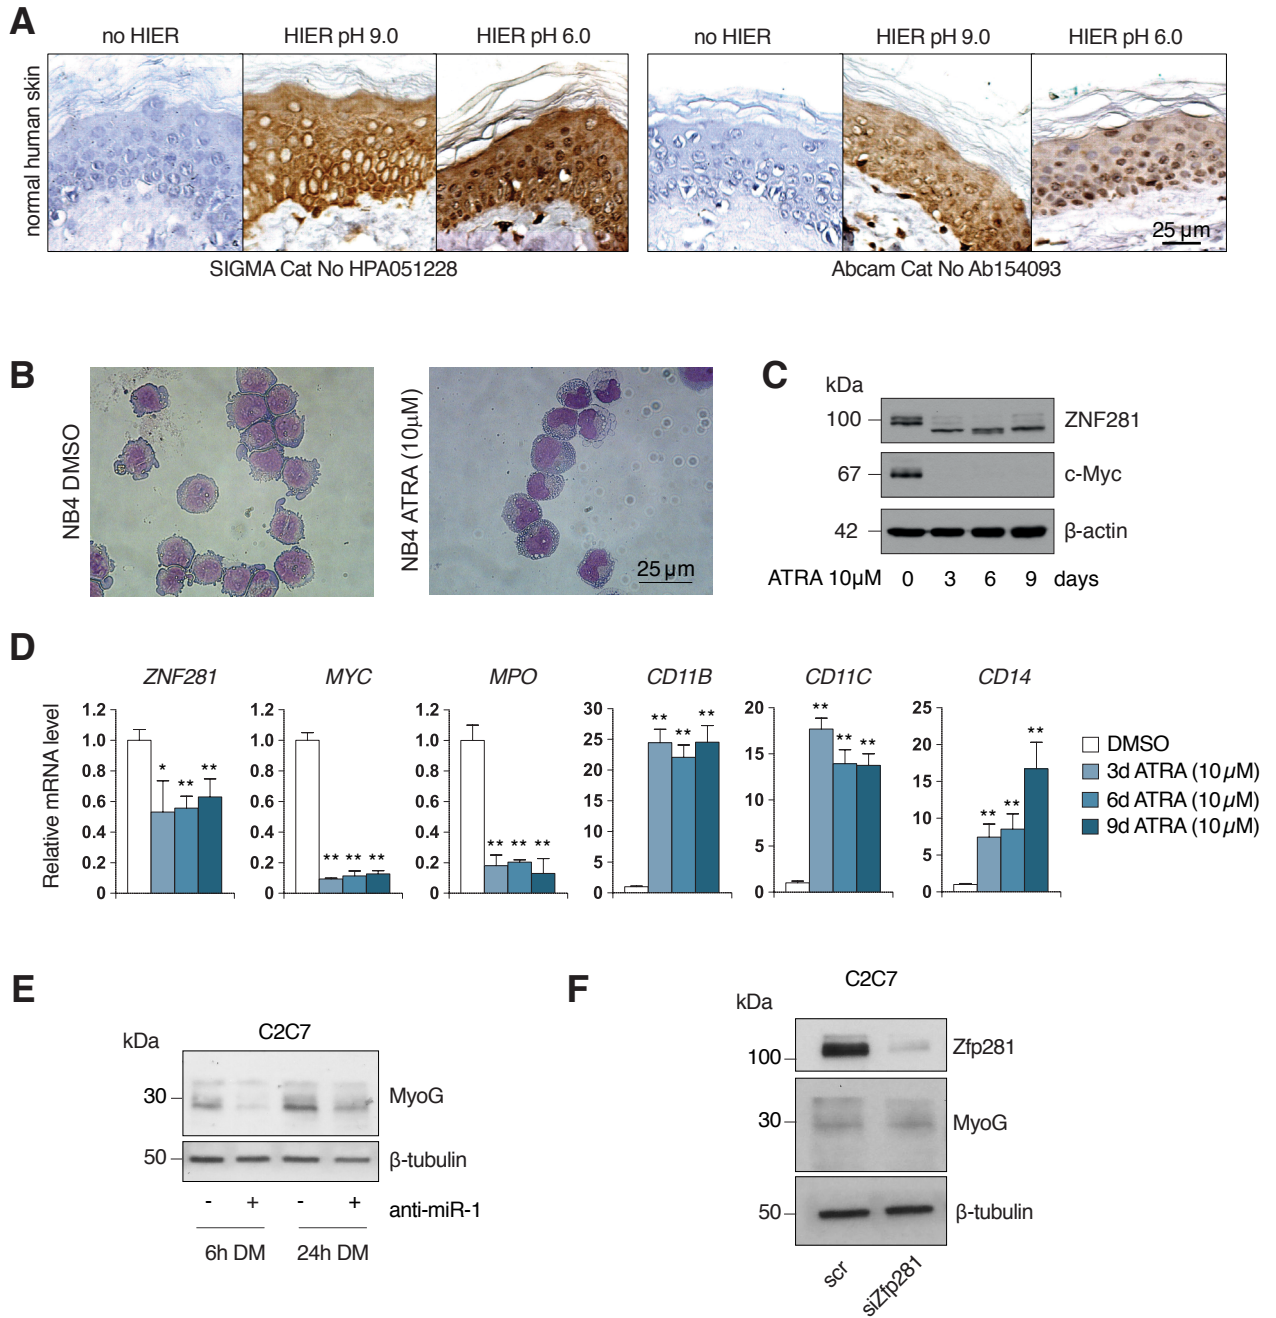

Supplement: MOL2-14-294-s002.pdf [file MOL2-14-294-s002.pdf]
