# Supplementary material for: ZNF281/Zfp281 is a target of miR‐1 and counteracts muscle differentiation
Source: PubMed Central journal article supplement (PMC6998661; doi:10.1002/1878-0261.12605), 2019-12-24
Supplement: MOL2-14-294-s006.pdf [file MOL2-14-294-s006.pdf]

*Nicolai et al.*  
**Supplementary Table S1.**

Bioinformatic analysis of miRNA sites in human *ZNF281* 3'-UTR

| MirTarget - miRDB 2019                          | Targetscan 7.1 (ver 2016)                                         | miRanda (2010)                                              |
|-------------------------------------------------|-------------------------------------------------------------------|-------------------------------------------------------------|
| method: Support Vector Machine                  | method: Seed complementary                                        | method: Complementary                                       |
| <a href="http://mirdb.org">http://mirdb.org</a> | <a href="http://www.targetscan.org">http://www.targetscan.org</a> | <a href="http://www.microma.org">http://www.microma.org</a> |
| <b>203 miRNAs</b>                               | <b>119 miRNAs</b>                                                 | <b>69 miRNAs</b>                                            |
| <b>hsa-miR-1</b>                                | <b>hsa-miR-1</b>                                                  | <b>hsa-miR-1</b>                                            |
| <b>hsa-miR-125a</b>                             | <b>hsa-miR-125a</b>                                               | <b>hsa-miR-125a</b>                                         |
| <b>hsa-miR-125b</b>                             | <b>hsa-miR-125b</b>                                               | <b>hsa-miR-125b</b>                                         |
| <b>hsa-miR-129</b>                              | <b>hsa-miR-129</b>                                                | <b>hsa-miR-129</b>                                          |
| <b>hsa-miR-196a</b>                             | <b>hsa-miR-196a</b>                                               | <b>hsa-miR-196a</b>                                         |
| <b>hsa-miR-196b</b>                             | <b>hsa-miR-196b</b>                                               | <b>hsa-miR-196b</b>                                         |
| <b>hsa-miR-203</b>                              | <b>hsa-miR-203</b>                                                | <b>hsa-miR-203</b>                                          |
| <b>hsa-miR-206</b>                              | <b>hsa-miR-206</b>                                                | <b>hsa-miR-206</b>                                          |
| <b>hsa-miR-23a</b>                              | <b>hsa-miR-23a</b>                                                | <b>hsa-miR-23a</b>                                          |
| <b>hsa-miR-23b</b>                              | <b>hsa-miR-23b</b>                                                | <b>hsa-miR-23b</b>                                          |
| <b>hsa-miR-320a</b>                             | <b>hsa-miR-320a</b>                                               | <b>hsa-miR-320a</b>                                         |
| <b>hsa-miR-320b</b>                             | <b>hsa-miR-320b</b>                                               | <b>hsa-miR-320b</b>                                         |
| <b>hsa-miR-320c</b>                             | <b>hsa-miR-320c</b>                                               | <b>hsa-miR-320c</b>                                         |
| <b>hsa-miR-320d</b>                             | <b>hsa-miR-320d</b>                                               | <b>hsa-miR-320d</b>                                         |
| <b>hsa-miR-33a</b>                              | <b>hsa-miR-33a</b>                                                | <b>hsa-miR-33a</b>                                          |
| <b>hsa-miR-33b</b>                              | <b>hsa-miR-33b</b>                                                | <b>hsa-miR-33b</b>                                          |
| <b>hsa-miR-34a</b>                              | <b>hsa-miR-34a</b>                                                | <b>hsa-miR-34a</b>                                          |
| <b>hsa-miR-34c</b>                              | <b>hsa-miR-34c</b>                                                | <b>hsa-miR-34c</b>                                          |
| <b>hsa-miR-382</b>                              | <b>hsa-miR-382</b>                                                | <b>hsa-miR-382</b>                                          |
| <b>hsa-miR-449a</b>                             | <b>hsa-miR-449a</b>                                               | <b>hsa-miR-449a</b>                                         |
| <b>hsa-miR-449b</b>                             | <b>hsa-miR-449b</b>                                               | <b>hsa-miR-449b</b>                                         |
| <b>hsa-miR-450a</b>                             | <b>hsa-miR-450a</b>                                               | <b>hsa-miR-450a</b>                                         |
| <b>hsa-miR-488</b>                              | <b>hsa-miR-488</b>                                                | <b>hsa-miR-488</b>                                          |
| <b>hsa-miR-494</b>                              | <b>hsa-miR-494</b>                                                | <b>hsa-miR-494</b>                                          |
| <b>hsa-miR-495</b>                              | <b>hsa-miR-495</b>                                                | <b>hsa-miR-495</b>                                          |
| <b>hsa-miR-613</b>                              | <b>hsa-miR-613</b>                                                | <b>hsa-miR-613</b>                                          |
| hsa-miR-10399                                   | hsa-miR-101                                                       | hsa-let-7b                                                  |
| hsa-miR-10400                                   | hsa-miR-122                                                       | hsa-let-7c                                                  |
| hsa-miR-106a                                    | hsa-miR-124                                                       | hsa-let-7i                                                  |
| hsa-miR-1200                                    | hsa-miR-136                                                       | hsa-miR-106a                                                |
| hsa-miR-12127                                   | hsa-miR-137                                                       | hsa-miR-106b                                                |
| hsa-miR-12136                                   | hsa-miR-139                                                       | hsa-miR-128                                                 |
| hsa-miR-124                                     | hsa-miR-140                                                       | hsa-miR-137                                                 |
| hsa-miR-1248                                    | hsa-miR-141                                                       | hsa-miR-17                                                  |
| hsa-miR-1272                                    | hsa-miR-142                                                       | hsa-miR-181a                                                |
| hsa-miR-1284                                    | hsa-miR-145                                                       | hsa-miR-181b                                                |
| hsa-miR-1321                                    | hsa-miR-146                                                       | hsa-miR-181c                                                |
| hsa-miR-141                                     | hsa-miR-153                                                       | hsa-miR-181d                                                |
| hsa-miR-152                                     | hsa-miR-154                                                       | hsa-miR-183                                                 |

|              |              |              |
|--------------|--------------|--------------|
| hsa-miR-154  | hsa-miR-186  | hsa-miR-186  |
| hsa-miR-1587 | hsa-miR-188  | hsa-miR-199a |
| hsa-miR-182  | hsa-miR-19   | hsa-miR-199b |
| hsa-miR-188  | hsa-miR-194  | hsa-miR-20a  |
| hsa-miR-200a | hsa-miR-199  | hsa-miR-20b  |
| hsa-miR-2115 | hsa-miR-200a | hsa-miR-216a |
| hsa-miR-2117 | hsa-miR-200b | hsa-miR-219  |
| hsa-miR-222  | hsa-miR-200c | hsa-miR-22   |
| hsa-miR-2278 | hsa-miR-204  | hsa-miR-223  |
| hsa-miR-23c  | hsa-miR-205  | hsa-miR-300  |
| hsa-miR-3065 | hsa-miR-211  | hsa-miR-30a  |
| hsa-miR-3074 | hsa-miR-212  | hsa-miR-30b  |
| hsa-miR-3124 | hsa-miR-216a | hsa-miR-30c  |
| hsa-miR-3129 | hsa-miR-216b | hsa-miR-30d  |
| hsa-miR-3133 | hsa-miR-22   | hsa-miR-30e  |
| hsa-miR-3140 | hsa-miR-223  | hsa-miR-367  |
| hsa-miR-3148 | hsa-miR-224  | hsa-miR-371  |
| hsa-miR-3163 | hsa-miR-23c  | hsa-miR-374a |
| hsa-miR-3201 | hsa-miR-24   | hsa-miR-374b |
| hsa-miR-323a | hsa-miR-28   | hsa-miR-375  |
| hsa-miR-329  | hsa-miR-302  | hsa-miR-376c |
| hsa-miR-338  | hsa-miR-31   | hsa-miR-381  |
| hsa-miR-3606 | hsa-miR-320  | hsa-miR-454  |
| hsa-miR-362  | hsa-miR-323  | hsa-miR-485  |
| hsa-miR-3620 | hsa-miR-326  | hsa-miR-543  |
| hsa-miR-3652 | hsa-miR-329  | hsa-miR-7    |
| hsa-miR-3658 | hsa-miR-330  | hsa-miR-708  |
| hsa-miR-3664 | hsa-miR-335  | hsa-miR-875  |
| hsa-miR-3686 | hsa-miR-340  | hsa-miR-9    |
| hsa-miR-369  | hsa-miR-34b  | hsa-miR-98   |
| hsa-miR-3714 | hsa-miR-362  |              |
| hsa-miR-371a | hsa-miR-369  |              |
| hsa-miR-371b | hsa-miR-371  |              |
| hsa-miR-372  | hsa-miR-371a |              |
| hsa-miR-373  | hsa-miR-371b |              |
| hsa-miR-374a | hsa-miR-372  |              |
| hsa-miR-374b | hsa-miR-373  |              |
| hsa-miR-374c | hsa-miR-374  |              |
| hsa-miR-378a | hsa-miR-374c |              |
| hsa-miR-3910 | hsa-miR-375  |              |
| hsa-miR-3927 | hsa-miR-376  |              |
| hsa-miR-3929 | hsa-miR-381  |              |
| hsa-miR-3938 | hsa-miR-384  |              |
| hsa-miR-3941 | hsa-miR-409  |              |
| hsa-miR-3973 | hsa-miR-410  |              |
| hsa-miR-4255 | hsa-miR-411  |              |
| hsa-miR-4273 | hsa-miR-421  |              |
| hsa-miR-4310 | hsa-miR-429  |              |
| hsa-miR-4319 | hsa-miR-431  |              |
| hsa-miR-4324 | hsa-miR-4319 |              |
| hsa-miR-4328 | hsa-miR-4429 |              |
| hsa-miR-4330 | hsa-miR-450  |              |

|               |              |
|---------------|--------------|
| hsa-miR-4422  | hsa-miR-451  |
| hsa-miR-4429  | hsa-miR-451a |
| hsa-miR-4430  | hsa-miR-452  |
| hsa-miR-4432  | hsa-miR-485  |
| hsa-miR-4478  | hsa-miR-486  |
| hsa-miR-4495  | hsa-miR-487  |
| hsa-miR-4499  | hsa-miR-487a |
| hsa-miR-4517  | hsa-miR-493  |
| hsa-miR-451b  | hsa-miR-499a |
| hsa-miR-4534  | hsa-miR-501  |
| hsa-miR-4639  | hsa-miR-502  |
| hsa-miR-466   | hsa-miR-505  |
| hsa-miR-4661  | hsa-miR-506  |
| hsa-miR-4666a | hsa-miR-520  |
| hsa-miR-4672  | hsa-miR-543  |
| hsa-miR-4674  | hsa-miR-5688 |
| hsa-miR-4690  | hsa-miR-582  |
| hsa-miR-4732  | hsa-miR-653  |
| hsa-miR-4739  | hsa-miR-655  |
| hsa-miR-4756  | hsa-miR-665  |
| hsa-miR-4761  | hsa-miR-668  |
| hsa-miR-4772  | hsa-miR-670  |
| hsa-miR-4791  | hsa-miR-6866 |
| hsa-miR-4802  | hsa-miR-7    |
| hsa-miR-487a  | hsa-miR-802  |
| hsa-miR-493   | hsa-miR-873  |
| hsa-miR-499a  | hsa-miR-876  |
| hsa-miR-5003  | hsa-miR-892  |
| hsa-miR-506   |              |
| hsa-miR-512   |              |
| hsa-miR-513a  |              |
| hsa-miR-513b  |              |
| hsa-miR-513c  |              |
| hsa-miR-514b  |              |
| hsa-miR-518a  |              |
| hsa-miR-518b  |              |
| hsa-miR-518c  |              |
| hsa-miR-518d  |              |
| hsa-miR-518f  |              |
| hsa-miR-5197  |              |
| hsa-miR-526a  |              |
| hsa-miR-544b  |              |
| hsa-miR-548a  |              |
| hsa-miR-548ar |              |
| hsa-miR-548at |              |
| hsa-miR-548au |              |
| hsa-miR-548av |              |
| hsa-miR-548az |              |
| hsa-miR-548bc |              |
| hsa-miR-548c  |              |
| hsa-miR-548e  |              |
| hsa-miR-548f  |              |

|               |
|---------------|
| hsa-miR-548g  |
| hsa-miR-548k  |
| hsa-miR-548n  |
| hsa-miR-5580  |
| hsa-miR-5582  |
| hsa-miR-5583  |
| hsa-miR-568   |
| hsa-miR-5681a |
| hsa-miR-5685  |
| hsa-miR-5688  |
| hsa-miR-5692a |
| hsa-miR-5692b |
| hsa-miR-5692c |
| hsa-miR-5699  |
| hsa-miR-5700  |
| hsa-miR-582   |
| hsa-miR-603   |
| hsa-miR-6079  |
| hsa-miR-610   |
| hsa-miR-6124  |
| hsa-miR-6128  |
| hsa-miR-616   |
| hsa-miR-633   |
| hsa-miR-649   |
| hsa-miR-6499  |
| hsa-miR-6504  |
| hsa-miR-655   |
| hsa-miR-670   |
| hsa-miR-671   |
| hsa-miR-6739  |
| hsa-miR-6761  |
| hsa-miR-6768  |
| hsa-miR-6828  |
| hsa-miR-6831  |
| hsa-miR-6835  |
| hsa-miR-6854  |
| hsa-miR-6856  |
| hsa-miR-6857  |
| hsa-miR-6866  |
| hsa-miR-6868  |
| hsa-miR-6873  |
| hsa-miR-7-1   |
| hsa-miR-7106  |
| hsa-miR-7152  |
| hsa-miR-7156  |
| hsa-miR-7157  |
| hsa-miR-7-2   |
| hsa-miR-7844  |
| hsa-miR-7849  |
| hsa-miR-8054  |
| hsa-miR-8070  |
| hsa-miR-8082  |

|              |
|--------------|
| hsa-miR-8087 |
| hsa-miR-8485 |
| hsa-miR-885  |
| hsa-miR-889  |
| hsa-miR-9    |
| hsa-miR-936  |
| hsa-miR-95   |
| hsa-miR-9983 |
