# Supplementary material for: ZNF281/Zfp281 is a target of miR‐1 and counteracts muscle differentiation
Source: PubMed Central journal article supplement (PMC6998661; doi:10.1002/1878-0261.12605), 2019-12-24
Supplement: MOL2-14-294-s009.pdf [file MOL2-14-294-s009.pdf]

Nicolai et al.  
**Supplementary Table S4.**  
 Tissue microarray TMA-SO751a from US Biomax (leiomyosarcoma/rhabdomyosarcoma duplicate cores per case)

Scoring of nuclear ZNF281 expression level:

intensity (0/1/2/3)  
 % pos cells (0%-100%)  
 histological "H-score" (as intens %: 0-300)

| Pos. | No. | Age | Sex | Organ          | Pathology diagnosis                              | TNM        | Type      | Tissue ID. | nuclear ZNF281 |    |         |                 |            |
|------|-----|-----|-----|----------------|--------------------------------------------------|------------|-----------|------------|----------------|----|---------|-----------------|------------|
|      |     |     |     |                |                                                  |            |           |            | intens         | %  | H-score | H-index patient | Patient ID |
| A1   | 1   | 85  | M   | Skin           | High malignant leiomyosarcoma                    | T2aN0M0 G3 | Malignant | Sfb040082  | 1              | 20 | 20      | 40              | Sfb040082  |
| A2   | 2   | 85  | M   | Skin           | High malignant leiomyosarcoma                    | T2aN0M0 G3 | Malignant | Sfb040082  | 1              | 60 | 60      |                 |            |
| A3   | 3   | 42  | M   | Peritoneum     | Moderate malignant leiomyosarcoma                | T2bN0M0 G2 | Malignant | Aac020130  | 1              | 50 | 50      | 50              | Aac020130  |
| A4   | 4   | 42  | M   | Peritoneum     | Moderate malignant leiomyosarcoma                | T2bN0M0 G2 | Malignant | Aac020130  | 1              | 50 | 50      |                 |            |
| A5   | 5   | 56  | F   | Skin           | Moderate malignant leiomyosarcoma                | T2bN0M0 G2 | Malignant | Sfb040134  | 1              | 90 | 90      | 90              | Sfb040134  |
| A6   | 6   | 56  | F   | Skin           | Moderate malignant leiomyosarcoma                | T2bN0M0 G2 | Malignant | Sfb040134  | 1              | 90 | 90      |                 |            |
| A7   | 7   | 74  | F   | Skin           | Low malignant leiomyosarcoma                     | T1aN0M0 G1 | Malignant | Sfb040277  | 0              | 0  | 0       | 0               | Sfb040277  |
| A8   | 8   | 74  | F   | Skin           | Low malignant leiomyosarcoma                     | T1aN0M0 G1 | Malignant | Sfb040277  | 0              | 0  | 0       |                 |            |
| A9   | 9   | 34  | M   | Skin           | Moderate malignant leiomyosarcoma                | T1bN0M0 G2 | Malignant | Sfb040309  | 1              | 70 | 70      | 55              | Sfb040309  |
| B1   | 10  | 34  | M   | Skin           | Moderate malignant leiomyosarcoma                | T1bN0M0 G2 | Malignant | Sfb040309  | 1              | 40 | 40      |                 |            |
| B2   | 11  | 20  | F   | Skin           | Moderate malignant leiomyosarcoma                | T1N0M0 G3  | Malignant | Ssm020249  | 0              | 0  | 0       | 0               | Ssm020249  |
| B3   | 12  | 20  | F   | Skin           | Moderate malignant leiomyosarcoma                | T1N0M0 G3  | Malignant | Ssm020249  | 0              | 0  | 0       |                 |            |
| B4   | 13  | 49  | F   | Skin           | Moderate malignant leiomyosarcoma                | T2aN0M0 G2 | Malignant | Sft040268  | 1              | 40 | 40      | 35              | Sft040268  |
| B5   | 14  | 49  | F   | Skin           | Moderate malignant leiomyosarcoma                | T2aN0M0 G2 | Malignant | Sft040268  | 1              | 30 | 30      |                 |            |
| B6   | 15  | 34  | F   | Skin           | Moderate malignant epithelioid leiomyosarcoma    | T2N0M0 G2  | Malignant | Sft040287  | 1              | 60 | 60      | 60              | Sft040287  |
| B7   | 16  | 34  | F   | Skin           | Moderate malignant epithelioid leiomyosarcoma    | T2N0M0 G2  | Malignant | Sft040287  | 1              | 60 | 60      |                 |            |
| B8   | 17  | 38  | M   | Skin           | Low malignant leiomyosarcoma                     | T1aN0M0 G1 | Malignant | Ssm030032  | 0,5            | 20 | 10      | 10              | Ssm030032  |
| B9   | 18  | 38  | M   | Skin           | Low malignant leiomyosarcoma                     | T1aN0M0 G1 | Malignant | Ssm030032  | 0,5            | 20 | 10      |                 |            |
| C1   | 19  | 44  | F   | Ligament       | Low malignant leiomyosarcoma                     | T2bN0M0 G1 | Malignant | Slm040092  | 0              | 0  | 0       | 0               | Slm040092  |
| C2   | 20  | 44  | F   | Ligament       | Low malignant leiomyosarcoma                     | T2bN0M0 G1 | Malignant | Slm040092  | 0              | 0  | 0       |                 |            |
| C3   | 21  | 69  | F   | abdominal cav  | Moderate malignant leiomyosarcoma                | T2bN0M0 G2 | Malignant | Ssm020181  | 0              | 0  | 0       | 0               | Ssm020181  |
| C4   | 22  | 69  | F   | abdominal cav  | Moderate malignant leiomyosarcoma                | T2bN0M0 G2 | Malignant | Ssm020181  | 0              | 0  | 0       |                 |            |
| C5   | 23  | 88  | F   | Skin           | Low malignant leiomyosarcoma                     | T1aN0M0 G1 | Malignant | Ssm010139  | 1              | 50 | 50      | 55              | Ssm010139  |
| C6   | 24  | 88  | F   | Skin           | Low malignant leiomyosarcoma                     | T1aN0M0 G1 | Malignant | Ssm010139  | 1              | 60 | 60      |                 |            |
| C7   | 25  | 54  | F   | Peritoneum     | Malignant pleomorphic leiomyosarcoma             | T2bN0M0 G3 | Malignant | Ssm030062  | 1              | 80 | 80      | 80              | Ssm030062  |
| C8   | 26  | 54  | F   | Peritoneum     | Malignant pleomorphic leiomyosarcoma             | T2bN0M0 G3 | Malignant | Ssm030062  | 1              | 80 | 80      |                 |            |
| C9   | 27  | 58  | F   | Skin           | Low malignant leiomyosarcoma                     | T2aN0M0 G2 | Malignant | Ssm030036  | 2              | 30 | 60      | 90              | Ssm030036  |
| D1   | 28  | 58  | F   | Skin           | Low malignant leiomyosarcoma                     | T2aN0M0 G2 | Malignant | Ssm030036  | 2              | 60 | 120     |                 |            |
| D2   | 29  | 57  | F   | Skin           | Low malignant leiomyosarcoma                     | T2aN0M0 G1 | Malignant | Ssm030079  | 2              | 60 | 120     | 187,5           | Ssm030079  |
| D3   | 30  | 57  | F   | Skin           | Low malignant leiomyosarcoma                     | T2aN0M0 G1 | Malignant | Ssm030079  | 3              | 85 | 255     |                 |            |
| D4   | 31  | 78  | M   | Chest wall     | Moderate malignant leiomyosarcoma                | T1aN0M0 G2 | Malignant | Ssm020205  | 0              | 0  | 0       | 0               | Ssm020205  |
| D5   | 32  | 78  | M   | Chest wall     | Moderate malignant leiomyosarcoma                | T1aN0M0 G2 | Malignant | Ssm020205  | 0              | 0  | 0       |                 |            |
| D6   | 33  | 52  | F   | Perineum       | Moderate malignant leiomyosarcoma                | T1aN0M0 G2 | Malignant | Ssm030067  | 0              | 0  | 0       | 0               | Ssm030067  |
| D7   | 34  | 52  | F   | Perineum       | Moderate malignant leiomyosarcoma                | T1aN0M0 G2 | Malignant | Ssm030067  | 0              | 0  | 0       |                 |            |
| D8   | 35  | 31  | M   | Mesentery      | Moderate malignant leiomyosarcoma                | T1aN0M0 G2 | Malignant | Amt020126  | 0              | 0  | 0       | 0               | Amt020126  |
| D9   | 36  | 31  | M   | Mesentery      | Moderate malignant leiomyosarcoma (fibrous tissu | T1aN0M0 G2 | Malignant | Amt020126  | 0              | 0  | 0       |                 |            |
| E1   | 37  | 16  | M   | Testis         | Pleomorphic rhabdomyosarcoma                     | T1bN0M0 G2 | Malignant | Mtt040096  | 0              | 0  | 0       | 0               | Mtt040096  |
| E2   | 38  | 16  | M   | Testis         | Pleomorphic rhabdomyosarcoma                     | T1bN0M0 G2 | Malignant | Mtt040096  | 0              | 0  | 0       |                 |            |
| E3   | 39  | 40  | M   | etroperitoneu  | Embryonic rhabdomyosarcoma                       | T1bN0M0 G3 | Malignant | Sst040330  | 0              | 0  | 0       | 0               | Sst040330  |
| E4   | 40  | 40  | M   | etroperitoneu  | Embryonic rhabdomyosarcoma                       | T1bN0M0 G3 | Malignant | Sst040330  | 0              | 0  | 0       |                 |            |
| E5   | 41  | 30  | M   | Skin           | Pleomorphic rhabdomyosarcoma                     | T2aN0M0 G2 | Malignant | Srm030089  | 1              | 70 | 70      | 70              | Srm030089  |
| E6   | 42  | 30  | M   | Skin           | Pleomorphic rhabdomyosarcoma                     | T2aN0M0 G2 | Malignant | Srm030089  | 1              | 70 | 70      |                 |            |
| E7   | 43  | 67  | F   | Cervix         | Spindle cell rhabdomyosarcoma                    | T2bN0M0 G3 | Malignant | Fdu040953  | 0              | 0  | 0       | 0               | Fdu040953  |
| E8   | 44  | 67  | F   | Cervix         | Spindle cell rhabdomyosarcoma                    | T2bN0M0 G3 | Malignant | Fdu040953  | 0              | 0  | 0       |                 |            |
| E9   | 45  | 50  | M   | Skin           | Pleomorphic rhabdomyosarcoma                     | T1aN0M0 G2 | Malignant | Srm040370  | 2              | 70 | 140     | 130             | Srm040370  |
| F1   | 46  | 50  | M   | Skin           | Pleomorphic rhabdomyosarcoma                     | T1aN0M0 G2 | Malignant | Srm040370  | 2              | 60 | 120     |                 |            |
| F2   | 47  | 91  | M   | Skin           | Rhabdomyosarcoma                                 | T2aN0M0 G3 | Malignant | Srm030172  | 0              | 0  | 0       | 0               | Srm030172  |
| F3   | 48  | 91  | M   | Skin           | Rhabdomyosarcoma                                 | T2aN0M0 G3 | Malignant | Srm030172  | 0              | 0  | 0       |                 |            |
| F4   | 49  | 33  | F   | keletal musc   | Embryonic rhabdomyosarcoma                       | T1aN0M0 G2 | Malignant | Sfb040332  | 0              | 0  | 0       | 0               | Sfb040332  |
| F5   | 50  | 33  | F   | keletal musc   | Embryonic rhabdomyosarcoma                       | T1aN0M0 G2 | Malignant | Sfb040332  | 0              | 0  | 0       |                 |            |
| F6   | 51  | 51  | F   | Cervix         | Pleomorphic rhabdomyosarcoma                     | T2bN0M0 G3 | Malignant | Fdu041147  | 0              | 0  | 0       | 0               | Fdu041147  |
| F7   | 52  | 51  | F   | Cervix         | Pleomorphic rhabdomyosarcoma                     | T2bN0M0 G3 | Malignant | Fdu041147  | 0              | 0  | 0       |                 |            |
| F8   | 53  | 74  | F   | Bladder        | Pleomorphic rhabdomyosarcoma                     | T2bN0M0 G3 | Malignant | Ubd040458  | 0              | 0  | 0       | 0               | Ubd040458  |
| F9   | 54  | 74  | F   | Bladder        | Pleomorphic rhabdomyosarcoma                     | T2bN0M0 G3 | Malignant | Ubd040458  | 0              | 0  | 0       |                 |            |
| G1   | 55  | 32  | F   | Cervix         | Pleomorphic rhabdomyosarcoma                     | T2bN0M0 G3 | Malignant | Fdu041182  | 0              | 0  | 0       | 0               | Fdu041182  |
| G2   | 56  | 32  | F   | Cervix         | Pleomorphic rhabdomyosarcoma                     | T2bN0M0 G3 | Malignant | Fdu041182  | 0              | 0  | 0       |                 |            |
| G3   | 57  | 49  | F   | Uterine cervix | Embryonic rhabdomyosarcoma                       | T2bN0M0 G3 | Malignant | Fur041163  | 0              | 0  | 0       | 0               | Fur041163  |
| G4   | 58  | 49  | F   | Uterine cervix | Embryonic rhabdomyosarcoma                       | T2bN0M0 G3 | Malignant | Fur041163  | 0              | 0  | 0       |                 |            |
| G5   | 59  | 49  | M   | Testis         | Embryonic rhabdomyosarcoma                       | T2bN0M0 G2 | Malignant | Mtt030229  | 2              | 90 | 180     | 180             | Mtt030229  |
| G6   | 60  | 49  | M   | Testis         | Embryonic rhabdomyosarcoma                       | T2bN0M0 G2 | Malignant | Mtt030229  | 2              | 90 | 180     |                 |            |
| G7   | 61  | 21  | M   | Peritoneum     | Pleomorphic rhabdomyosarcoma                     | T1bN0M0 G3 | Malignant | Apo040019  | 2              | 70 | 140     | 160             | Apo040019  |
| G8   | 62  | 21  | M   | Peritoneum     | Pleomorphic rhabdomyosarcoma                     | T1bN0M0 G3 | Malignant | Apo040019  | 2              | 90 | 180     |                 |            |
| G9   | 63  | 18  | M   | Oral cavity    | Alveolus rhabdomyosarcoma                        | T1bN0M0 G3 | Malignant | Doc030135  | 1              | 50 | 50      | 50              | Doc030135  |
| H1   | 64  | 18  | M   | Oral cavity    | Alveolus rhabdomyosarcoma                        | T1bN0M0 G3 | Malignant | Doc030135  | 1              | 50 | 50      |                 |            |
| H2   | 65  | 40  | F   | Peritoneum     | Pleomorphic rhabdomyosarcoma                     | T2bN0M0 G3 | Malignant | Aac040131  | 1              | 50 | 50      | 50              | Aac040131  |
| H3   | 66  | 40  | F   | Peritoneum     | Pleomorphic rhabdomyosarcoma                     | T2bN0M0 G3 | Malignant | Aac040131  | 1              | 50 | 50      |                 |            |
| H4   | 67  | 23  | F   | Cavitas pelvis | Alveolus rhabdomyosarcoma                        | T2bN0M0 G3 | Malignant | Apc040155  | 1              | 50 | 50      | 50              | Apc040155  |
| H5   | 68  | 23  | F   | Cavitas pelvis | Alveolus rhabdomyosarcoma                        | T2bN0M0 G3 | Malignant | Apc040155  | 1              | 50 | 50      |                 |            |
| H6   | 69  | 48  | M   | Aynovium       | Spindle cell rhabdomyosarcoma                    | T2N0M0 G2  | Malignant | Sst040026  | 0              | 0  | 0       | 0               | Sst040026  |
| H7   | 70  | 48  | M   | Aynovium       | Spindle cell rhabdomyosarcoma                    | T2N0M0 G2  | Malignant | Sst040026  | 0              | 0  | 0       |                 |            |
| H8   | 71  | 10  | M   | keletal musc   | Embryonic rhabdomyosarcoma                       | T2aN0M0 G2 | Malignant | Srm040374  | 3              | 90 | 270     | 205             | Srm040374  |
| H9   | 72  | 10  | M   | keletal musc   | Embryonic rhabdomyosarcoma                       | T2aN0M0 G2 | Malignant | Srm040374  | 2              | 70 | 140     |                 |            |
| I1   | 73  | 56  | F   | Uterine cervix | Smooth muscle tissue of Uterine cervix           | -          | NAT       | Aac140068  | 0              | 0  | 0       | 0               | Aac140068  |
| I2   | 74  | 8   | F   | keletal musc   | Skeletal muscle tissue                           | -          | Normal    | Ssm04N012  | 0              | 0  | 0       | 0               | Ssm04N012  |
| I3   | 75  | 26  | M   | Heart          | Cardiac muscle tissue                            | -          | Normal    | ChT03N014  | 0              | 0  | 0       | 0               | ChT03N014  |
